# Supplementary material
Source: MDPI journal article supplement (https://www.mdpi.com/2071-1050/16/2/520)
Supplement: s1 [file s1]

## Survey of travel habits of students/staff of the building complex of Technical faculties

Dear students and employees,

within the framework of the project LIFE CARE4CLIMATE, the Faculty of Civil Engineering, Transport Engineering and Architecture is investigating travel habits at the location of the building complex of Technical faculties in the city of Maribor. The aim of the project activities is to reduce greenhouse gas emissions caused by road traffic and contribute to sustainable mobility in the city.

With the survey, we want to examine our travel habits and find improvements that will contribute to their change. Your opinion means a lot to us, so we kindly invite you to answer the questions of the online survey, which will take you about 10 to 15 minutes.

**Participation is voluntary, and responses will be treated anonymously. The results will be used for scientific research purposes and will also be published. Submission of the online survey will be interpreted as your informed consent to participate, and that you confirm that you are at least 18 years of age.**

Dean of UM FGPA

Assoc. prof. dr. Vesna Žegarac Leskovar

Please print or save a copy of this page for your records!

- ☐ I have read the above information and agree to participate in this research project.

**1. PLEASE INDICATE YOUR POSITION AT UNIVERSITY OF MARIBOR.**

- ☐ Staff of UM.  
☐ Student of UM (daily migrant).  
☐ Student of UM (weekly migrant).

**2. PLEASE ENTER YOUR ZIP CODE AND PLACE OF PERMANENT RESIDENCE.**

ZIP code: \_\_\_\_\_

Place of permanent residence: \_\_\_\_\_

**3. IF YOU LIVE IN THE MUNICIPALITY OF MARIBOR, INDICATE IN WHICH CITY DISTRICT OR LOCAL COMMUNITY YOU LIVE.**

- |                                                       |                                                  |                                                  |
|-------------------------------------------------------|--------------------------------------------------|--------------------------------------------------|
| <input type="checkbox"/> MČ Brezje-<br>Dogoše-Zrkovci | <input type="checkbox"/> MČ Pobrežje             | <input type="checkbox"/> KS Pekre                |
| <input type="checkbox"/> MČ Center                    | <input type="checkbox"/> MČ Studenci             | <input type="checkbox"/> KS Razvanje             |
| <input type="checkbox"/> MČ Ivan Cankar               | <input type="checkbox"/> MČ Tabor                | <input type="checkbox"/> KS Malečnik-<br>Ruperče |
| <input type="checkbox"/> MČ Koroška vrata             | <input type="checkbox"/> MČ Tezno                | <input type="checkbox"/> Ne živim v MOM.         |
| <input type="checkbox"/> MČ Magdalena                 | <input type="checkbox"/> KS Bresternica -<br>Gaj |                                                  |
| <input type="checkbox"/> MČ Nova vas                  | <input type="checkbox"/> KS Kamnica              |                                                  |
| <input type="checkbox"/> MČ Radvanje                  | <input type="checkbox"/> KS Limbuš               |                                                  |

**3. HOW LONG IS YOUR COMMUTE TO FACULTY/WORK?**

- ☐ less than 1 km  
☐ 1 - 5 km  
☐ 5 - 10 km  
☐ 10 - 25 km  
☐ 25 - 50 km  
☐ more than 50 km

**4. PLEASE INDICATE HOW YOU USE THE CAR FOR COMMUTING.**

- ☐ Only as individual driver.  
☐ As co-driver (passenger).  
☐ As driver who also brings a passenger(s).  
☐ I don't drive a car.

**5. PLEASE INDICATE HOW MUCH TIME DO YOU SPEND ON AVERAGE FOR COMMUTING TRAVELING TO FACULTY BY CAR?**

- ☐ less than 15 minutes
- ☐ 15 - 30 minutes
- ☐ 30 - 45 minutes
- ☐ 45 - 60 minutes
- ☐ more than 60 minutes

**6. HOW LONG DOES IT TAKE YOU ON AVERAGE TO FIND A FREE PARKING SPACE?**

- ☐ I don't need to search
- ☐ less than 5 minutes
- ☐ 5 - 10 minutes
- ☐ 10 - 15 minutes
- ☐ more than 15 minutes

**7. SELECT THE MAIN REASONS WHY YOU USE A CAR FOR TRANSPORTATION.**

**(Please mark a maximum of 3 answers.)**

- ☐ I ride together with relatives/classmates/acquaintances/colleagues etc.
- ☐ I have no other option.
- ☐ Speed.
- ☐ Transport cost.
- ☐ Safety.
- ☐ Comfort and time predictability.
- ☐ Simplicity due to guaranteed parking.
- ☐ I combine transportation with other activities.

## 8. WHAT ARE THE MAIN BARRIERS TO NOT CHOOSING TO USE CAR-POOLING TO GET TO FACULTY/WORK?

(Please mark a maximum of 3 answers.)

- ☐ Personal safety (unfamiliarity with the vehicle, driver and passengers).
- ☐ Lack of information about the possibility of shared driving.
- ☐ Coordination of exit locations.
- ☐ Lack of confidence in the accuracy of arrangements (delays, cancellations of rides).
- ☐ Uncomfortable driving (too many passengers in the vehicle).
- ☐ Time adjustment.
- ☐ Inappropriate/short distance.

## 9. IMPROVEMENTS IN WHICH AREAS WOULD MOST CONVINCE YOU TO TAKE PASSENGERS IN YOUR CAR MORE OFTEN (CAR POOLING - EXAMPLE: PREVOZI.ORG) OR TO USE A CAR FROM THE VEHICLE RENTAL SYSTEM (CAR SHARING - EXAMPLE: AVANT2GO)?

(Please mark a maximum of 3 answers.)

- ☐ Raising awareness of the benefits of carpooling and carpooling.
- ☐ Educational course on carpooling and carpooling.
- ☐ Priorities on the road (e.g. the possibility of driving on yellow lanes).
- ☐ Reserved parking spaces.
- ☐ Benches for hitchhikers (arranged places for picking up and dropping off hitchhikers).
- ☐ Help in finding partners for traveling together or sharing vehicles.
- ☐ None.

## 10. HOW OFTEN DO YOU USE PUBLIC TRANSPORT TO GET TO FACULTY/WORK?

- ☐ daily
- ☐ 2x - 4x weekly
- ☐ 1x weekly
- ☐ 2x - 4x a month

- ☐ 1x per month
- ☐ never or a few times a year

**11. ON AVERAGE, HOW MUCH TIME DO YOU SPEND COMMUTING TO FACULTY/WORK BY PUBLIC TRANSPORT?**

- ☐ less than 15 minutes
- ☐ 15 - 30 minutes
- ☐ 30 - 45 minutes
- ☐ 45 - 60 minutes
- ☐ more than 60 minutes

**12. WHAT ARE THE MAIN BARRIERS TO NOT CHOOSING TO USE PUBLIC TRANSPORT TO GET TO FACULTY/WORK?**

**(Please mark a maximum of 3 answers.)**

- ☐ Inadequate distance to stop.
- ☐ Lack of suitable connections.
- ☐ Not enough frequent rides.
- ☐ Lack of information (e.g. opaque website for route planning, info screens).
- ☐ I have personal safety concerns.
- ☐ Inadequate/short distance.
- ☐ I prefer to choose another mode of travel.

**13. IMPROVEMENTS IN WHICH AREAS WOULD MOST CONVINCE YOU TO USE PUBLIC TRANSPORT (EVEN) MORE OFTEN?**

**(Please mark a maximum of 3 answers.)**

- ☐ Accessibility (e.g. parking spaces at stations, the possibility of transporting bicycles).
- ☐ Speed (eg lines with fewer stops, yellow lanes).
- ☐ Coordination (e.g. uniform transfer points, coordinated timetables).
- ☐ Less delays.
- ☐ Ticket offer (e.g. integrated ticket for all carriers, diverse offer of tariffs, discounts).
- ☐ Convenience (e.g. organized stations, modern buses).
- ☐ None of the above.

**14. HOW OFTEN DO YOU USE A BICYCLE TO GET TO FACULTY/WORK?**

- ☐ daily
- ☐ 2x - 4x weekly
- ☐ 1x weekly
- ☐ 2x - 4x a month
- ☐ 1x per month
- ☐ never or a few times a year

**15. ON AVERAGE, HOW MUCH TIME DO YOU SPEND COMMUTING TO FACULTY/WORK BY BICYCLE?**

- ☐ less than 15 minutes
- ☐ 15 - 30 minutes
- ☐ 30 - 45 minutes
- ☐ 45 - 60 minutes
- ☐ more than 60 minutes

**16. IMPROVEMENTS IN WHICH AREAS WOULD MOST CONVINCE YOU TO USE A BICYCLE FOR COMMUTING (EVEN) MORE OFTEN?**

**(Please mark a maximum of 3 answers.)**

- ☐ Introduction/improvement of the bicycle rental system.
- ☐ Raising awareness of the benefits of cycling for well-being, health and wallet.
- ☐ Information (e.g. transparent website with locations of safe parking lots, tracks).
- ☐ Integration with public transport (bicycle parking lots and rental points at stations, the possibility of transporting bicycles).
- ☐ Subsidies for the purchase of electric bicycles.
- ☐ A course on safe cycling in cities.
- ☐ Organized cycling to the faculty or workplace.
- ☐ Change of priority in intersections (e.g. cycle pockets, longer green phase for cyclists).
- ☐ None of the above.

**17. HOW OFTEN DO YOU GO TO FACULTY/WORKPLACE ON FOOT (OR WITH AN ORDINARY/ELECTRIC SCOOTER, SKATEBOARD, INLINE SKATES...)?**

- ☐ daily
- ☐ 2x - 4x weekly
- ☐ 1x weekly
- ☐ 2x - 4x a month
- ☐ 1x per month
- ☐ never or a few times a year

**18. HOW MUCH TIME DO YOU SPEND ON AVERAGE WALKING TO FACULTY/WORK?**

- ☐ less than 15 minutes
- ☐ 15 - 30 minutes
- ☐ 30 - 45 minutes
- ☐ 45 - 60 minutes
- ☐ more than 60 minutes

**19. IMPROVEMENTS IN WHICH AREAS WOULD MOST CONVINCE YOU TO WALK EVEN MORE OFTEN (OR WITH AN ORDINARY/ELECTRIC SCOOTER, SKATEBOARD, ROLLERBLADES...)?**

**(Please mark a maximum of 3 answers.)**

- ☐ Arrangement of a greener infrastructure for pedestrians.
- ☐ Raising awareness of the benefits of hiking for well-being, health, and wallet.
- ☐ Safer infrastructure for pedestrians (e.g. widening of the pedestrian zone, widening of sidewalks, pedestrian crossings).
- ☐ Organized walking to the faculty or workplace.
- ☐ Pedestrians have priority at the intersection and on the street (priority over vehicles and bicycles).
- ☐ None of the above.

**20. PLEASE INDICATE AGE GROUP YOU BELONG TO.**

- ☐ up to 25 years
- ☐ 26 to 35 years old
- ☐ 36 to 45 years
- ☐ 46 to 55 years
- ☐ 56 to 65 years
- ☐ over 65 years old

**21. PLEASE INDICATE YOUR GENEDEDER.**

- ☐ female
- ☐ men
- ☐ I don't want to answer

**22. PLEASE INDICATE THE LEVEL OF EDUCATION COMPLETED.**

- ☐ PhD (ISCED 8)
- ☐ university level (ISCED 5-7)
- ☐ secondary school (ISCED 3-4)
- ☐ vocational and elementary school (ISCED 1-2)

**23. PLEASE INDICATE EMPLOYMENT OR STUDY LOCATION:**

- ☐ Faculty of Civil Engineering, Transportation Engineering and Architecture
- ☐ Faculty of Chemistry and Chemical Engineering
- ☐ Faculty of Mechanical Engineering
- ☐ Faculty of Electrical Engineering and Computer Science

**Your cooperation helped to obtain important data in the research.**

**Thank you for your answers!**
